# Supplementary material for: Paf1 and Ctr9 subcomplex formation is essential for Paf1 complex assembly and functional regulation
Source: PubMed Central journal article supplement (PMC6143631; doi:10.1038/s41467-018-06237-7), 2018-09-18
Supplement: 41467_2018_6237_MOESM1_ESM.pdf [file 41467_2018_6237_MOESM1_ESM.pdf]

**Paf1 and Ctr9 subcomplex formation is essential for Paf1  
complex assembly and functional regulation**

Xie et al.

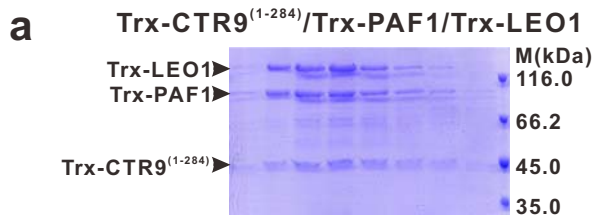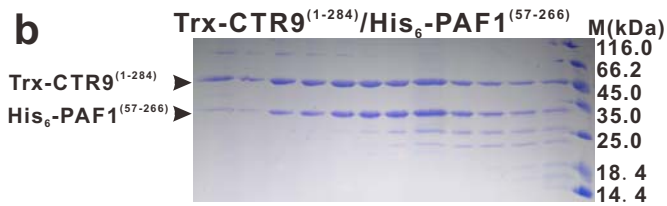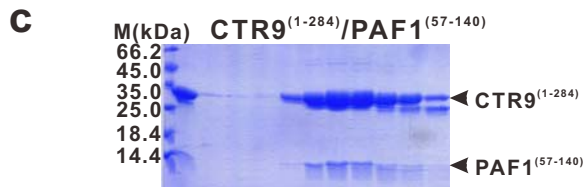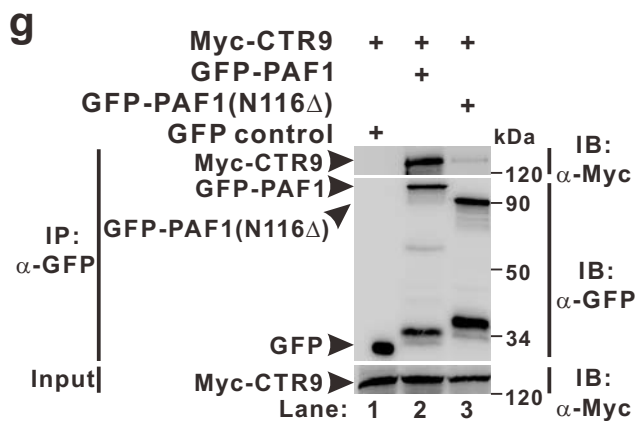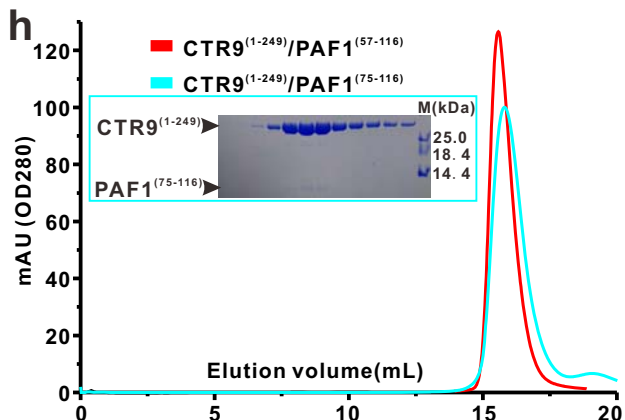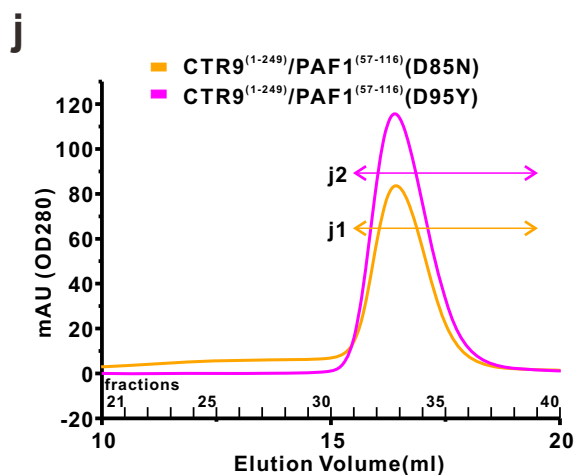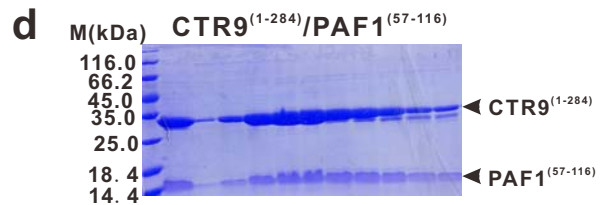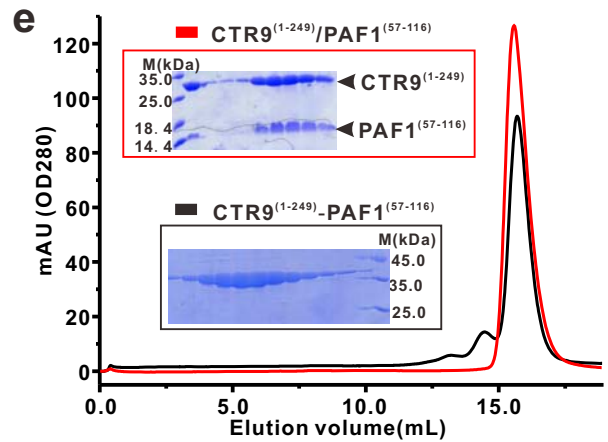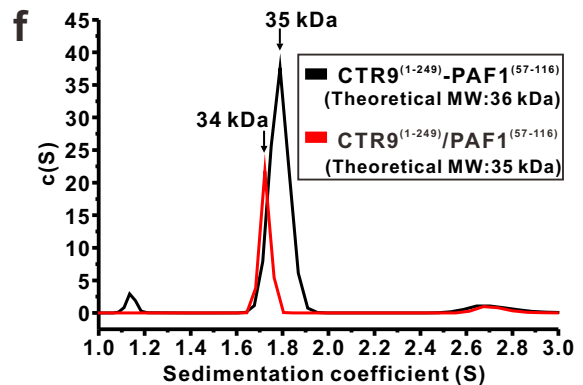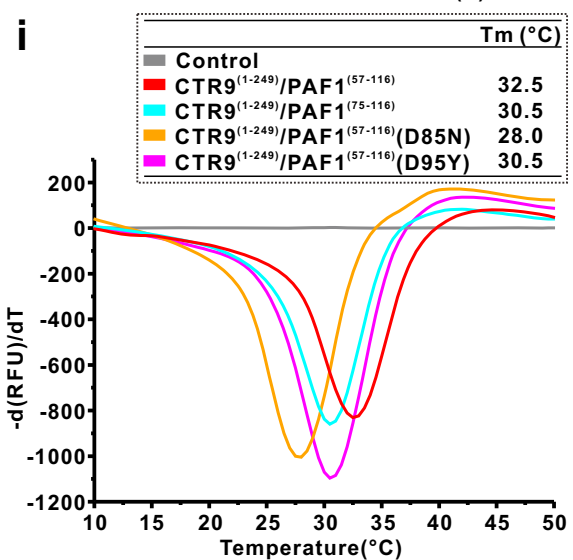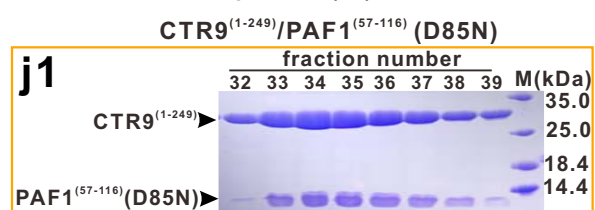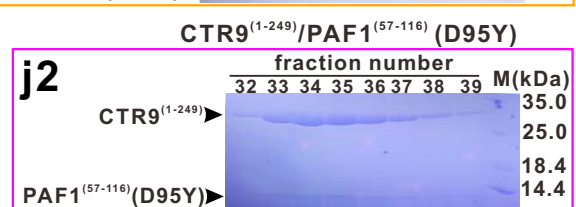

**Supplementary Figure 1. Human CTR9/PAF1 subcomplex adopt heterodimer with a 1:1 stoichiometry. (a-e)** SDS-PAGE of various human CTR9/PAF1 recombinant proteins by co-expression after gel filtration. For clarity, analytical gel filtration profiles are not shown, except two separate chains of CTR9<sup>(1-249)</sup>/PAF1<sup>(57-116)</sup> complex protein and the single chain fusion of CTR9<sup>(1-249)</sup>-PAF1<sup>(57-116)</sup> protein. "/" denotes protein complex with separate chains, while "-" denotes protein in a single-chain fusion (e). (f) The molecular weights of the purified proteins were measured by analytical ultracentrifugation sedimentation velocity (SV). c(s) distributions from the SV runs for the CTR9<sup>(1-249)</sup>-PAF1<sup>(57-116)</sup> (1.4 mg/ml, black line) and CTR9<sup>(1-249)</sup>/PAF1<sup>(57-116)</sup> (0.5 mg/ml, red line). (g) The N-terminal fragment amino acids 1-116 of PAF1 is essential for the interaction between full-length CTR9 and PAF1. Extracts were prepared from HEK293T cells transfected with various combinations of plasmids, as indicated. The bottom panel shows 3% of the Myc fusion proteins for each IP. (h and j) Analytical gel filtration profiles and SDS-PAGEs of CTR9<sup>(1-249)</sup>/PAF1<sup>(57-116)</sup> (red line in h), CTR9<sup>(1-249)</sup>/PAF1<sup>(75-116)</sup> (cyan line and insert in h), CTR9<sup>(1-249)</sup>/PAF1<sup>(57-116)</sup>(D85N) (j and j1) and CTR9<sup>(1-249)</sup>/PAF1<sup>(57-116)</sup>(D95Y) (j and j2). Those fractions shown in correspondent gels are indicated by a two-way arrow. (i) Differential scanning fluorimetry-based thermal denaturation assay showing the temperature-dependent denaturation profiles of CTR9<sup>(1-249)</sup>/PAF1<sup>(75-116)</sup> and CTR9<sup>(1-249)</sup>/PAF1<sup>(57-116)</sup> WT or mutants. Uncropped gels are shown in Supplementary Fig. 8.



**Supplementary Figure 2. Structure-based sequence alignment of CTR9 from different species.** In this alignment, the secondary structures of human CTR9 and yeast Ctr9 are shown at the top and bottom, respectively, according to the crystal structures of CTR9<sup>(1-249)</sup>-PAF1<sup>(57-116)</sup> and Ctr9<sup>(1-313)</sup>-Paf1<sup>(34-103)</sup>, and conserved residues are shaded in red. The disease-associated amino acids substitutions P164S, R201C, or A220T (Category 1 shown in Fig. **3a**), P25L, A67T D77V, L89F, N102K, S159F, S173F, Y185C, E215K, or C231F (Category 2 shown in Supplementary Table 2), and R98W (Category 3 shown in Fig. **3a**) are indicated with red, orange , and green spheres, respectively. The GenBank numbers are shown at the end of each alignment.

**a**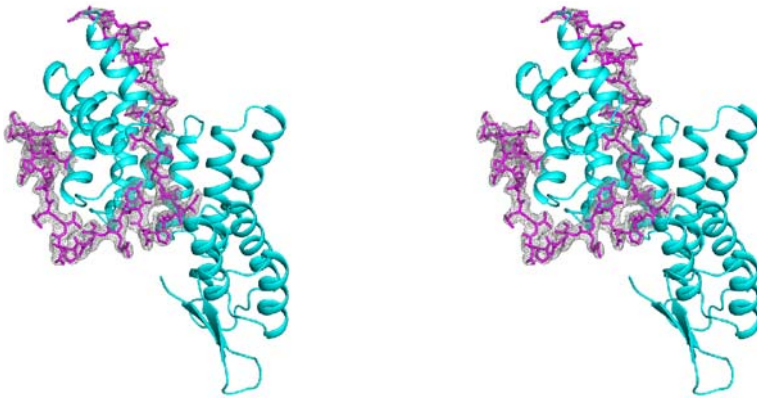**b**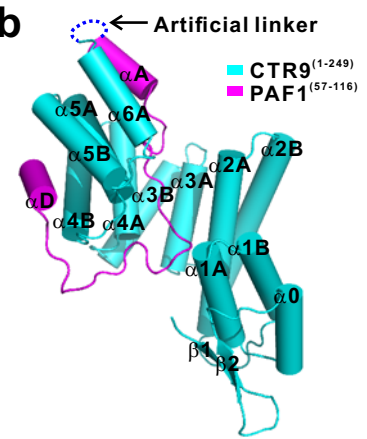**c**CTR9<sup>(1-249)</sup>-PAF1<sup>(57-116)</sup>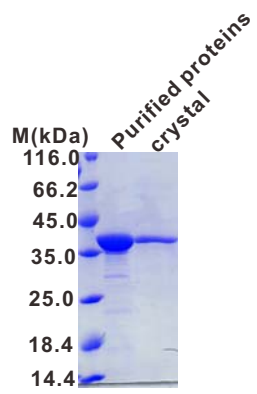**d**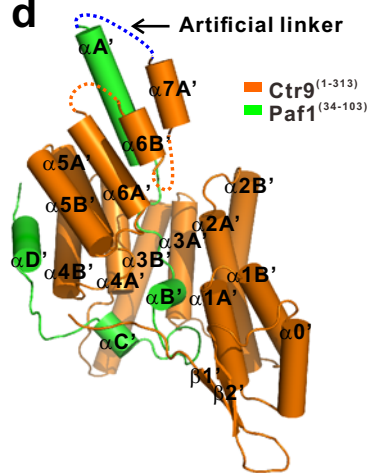**e**Ctr9<sup>(1-313)</sup>-Paf1<sup>(34-103)</sup>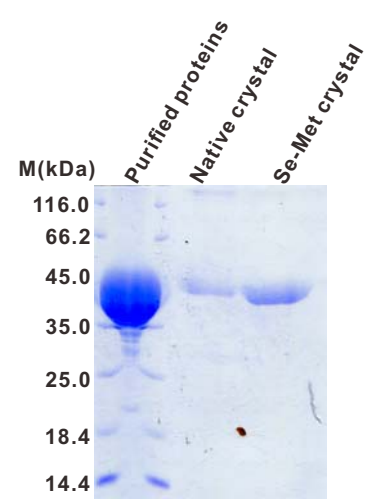**f**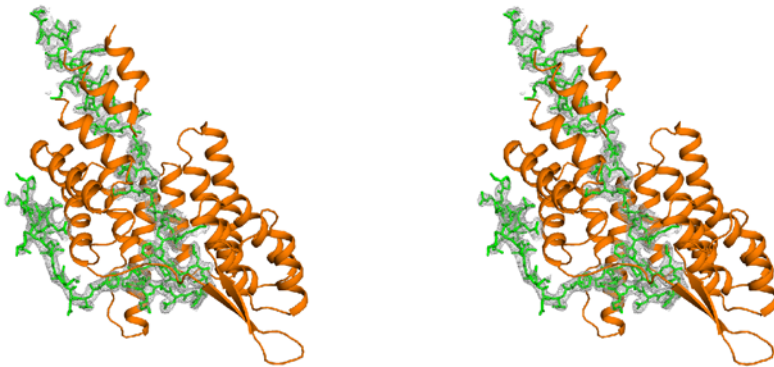

**Supplementary Figure 3. Comparison of purified and crystallized proteins.** (a and f) Stereo images of the omit maps for the CTR9/PAF1 heterodimer (a) and the Ctr9/Paf1 heterodimer (f) contoured at  $1.0 \sigma$ . (b and d) Cartoon representations of the overall structure of the single chain fusion of the CTR9 (cyan)/PAF1 (magenta) heterodimer (b) and the Ctr9 (orange)/Paf1 (green) heterodimer (d). (c and e) SDS-PAGEs of the Purified CTR9<sup>(1-249)</sup>-PAF1<sup>(57-116)</sup> and the CTR9<sup>(1-249)</sup>-PAF1<sup>(57-116)</sup> proteins dissolved from crystals are shown (c), and the Purified Ctr9<sup>(1-313)</sup>-Paf1<sup>(34-103)</sup> and the Ctr9<sup>(1-313)</sup>-Paf1<sup>(34-103)</sup> proteins dissolved from native or Se-Met crystals are shown (e). The crystals were transferred into mother liquor, washed three times and finally dissolved into 10  $\mu$ l buffer (20 mM HEPES, pH 7.5, 150 mM NaCl, 1 mM EDTA, and 1 mM DTT). All solutions were loaded onto a 15% SDS-PAGE gel.

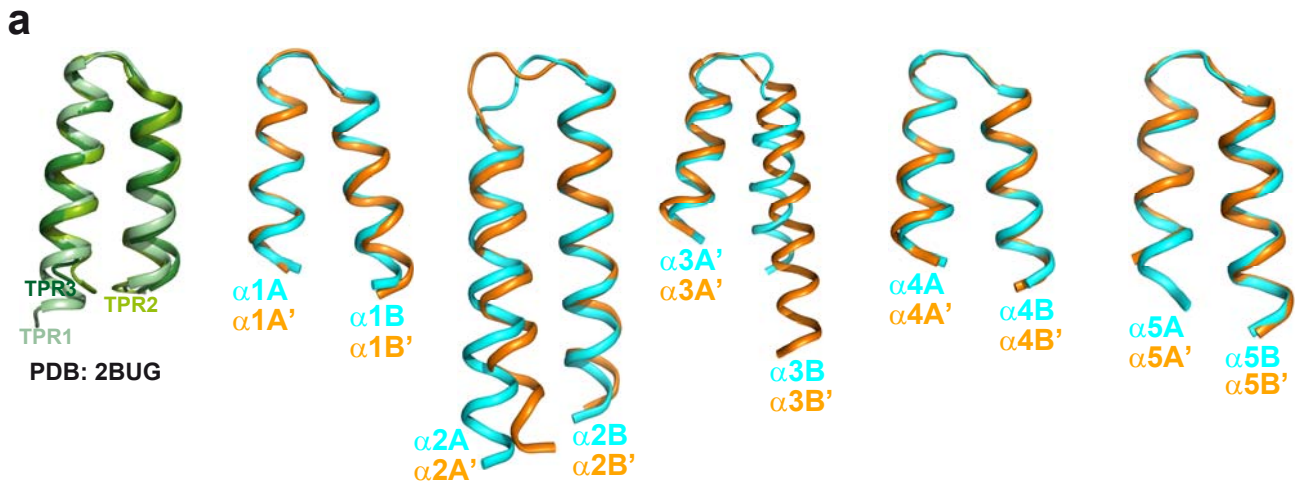

**b**

|               | A helix        |                |                |                 | B helix         |                 |                 |                 |   |   |   |   |   |   |   |   |   |   |   |   |   |   |   |   |   |   |   |   |   |   |   |   |   |   |     |     |     |   |   |   |   |   |   |   |   |   |     |   |   |     |   |     |
|---------------|----------------|----------------|----------------|-----------------|-----------------|-----------------|-----------------|-----------------|---|---|---|---|---|---|---|---|---|---|---|---|---|---|---|---|---|---|---|---|---|---|---|---|---|---|-----|-----|-----|---|---|---|---|---|---|---|---|---|-----|---|---|-----|---|-----|
| Canonical TPR | W <sup>4</sup> | L <sup>7</sup> | G <sup>8</sup> | Y <sup>11</sup> | A <sup>20</sup> | Y <sup>24</sup> | A <sup>27</sup> | P <sup>32</sup> |   |   |   |   |   |   |   |   |   |   |   |   |   |   |   |   |   |   |   |   |   |   |   |   |   |   |     |     |     |   |   |   |   |   |   |   |   |   |     |   |   |     |   |     |
| Human TPR1    | 41             | L              | H              | I               | W               | I               | A               | L               | A | L | E | Y | Y | K | Q | G | K | T | E | E | F | V | K | L | L | E | A | A | R | I | D | G | N | L | D   | 74  |     |   |   |   |   |   |   |   |   |   |     |   |   |     |   |     |
| TPR2          | 78             | H              | E              | K               | D               | Q               | M               | T               | C | L | D | T | L | A | A | Y | Y | V | Q | Q | A | R | K | E | K | N | K | D | N | K | K | D | L | I | T   | Q   | A   | T | L | L | Y | T | M | A | D | K | I   | I | M | Y   | D | 127 |
| TPR3          | 129            | N              | H              | L               | L               | G               | R               | A               | C | F | C | L | L | E | G | D | K | M | D | Q | A | D | A | Q | F | H | F | V | L | N | Q | S | P | N | N   | P   | 162 |   |   |   |   |   |   |   |   |   |     |   |   |     |   |     |
| TPR4          | 163            | I              | P              | A               | L               | L               | G               | K               | A | C | I | S | F | N | K | K | D | Y | R | G | A | L | A | Y | Y | K | K | A | L | R | T | N | P | G | C   | 196 |     |   |   |   |   |   |   |   |   |   |     |   |   |     |   |     |
| TPR5          | 198            | A              | E              | V               | R               | L               | G               | M               | G | H | C | F | V | K | L | N | K | L | E | K | A | R | L | A | F | S | R | A | L | E | L | N | S | K | C   | 231 |     |   |   |   |   |   |   |   |   |   |     |   |   |     |   |     |
| Yeast TPR1    | 56             | K              | E              | H               | W               | L               | T               | I               | A | L | A | Y | C | N | H | G | K | T | N | E | G | I | K | L | I | E | M | A | L | D | V | F | Q | N | S   | 89  |     |   |   |   |   |   |   |   |   |   |     |   |   |     |   |     |
| TPR2          | 90             | E              | R              | A               | S               | L               | H               | T               | F | L | T | W | A | H | L | N | L | A | K | G | Q | S | L | S | V | E | T | K | E | H | E | L | T | Q | A   | E   | L   | N | L | K | D | A | I | G | F | D | P   | T | W | 137 |   |     |
| TPR3          | 138            | I              | G              | N               | M               | L               | A               | T               | V | E | L | Y | Y | Q | R | G | H | Y | D | K | A | L | E | T | S | D | L | F | V | K | S | I | H | A | E   | D   | H   | R | S | G | R | Q | S | K | P | N | 182 |   |   |     |   |     |
| TPR4          | 183            | C              | L              | F               | L               | L               | R               | A               | K | L | L | Y | Q | K | K | N | Y | M | A | S | L | K | I | F | Q | E | L | L | V | I | N | P | V | L | 216 |     |     |   |   |   |   |   |   |   |   |   |     |   |   |     |   |     |
| TPR5          | 220            | P              | D              | P               | R               | I               | G               | I               | G | L | C | F | W | Q | L | K | D | S | K | M | A | I | K | S | W | Q | R | A | L | Q | L | N | P | K | N   | 252 |     |   |   |   |   |   |   |   |   |   |     |   |   |     |   |     |

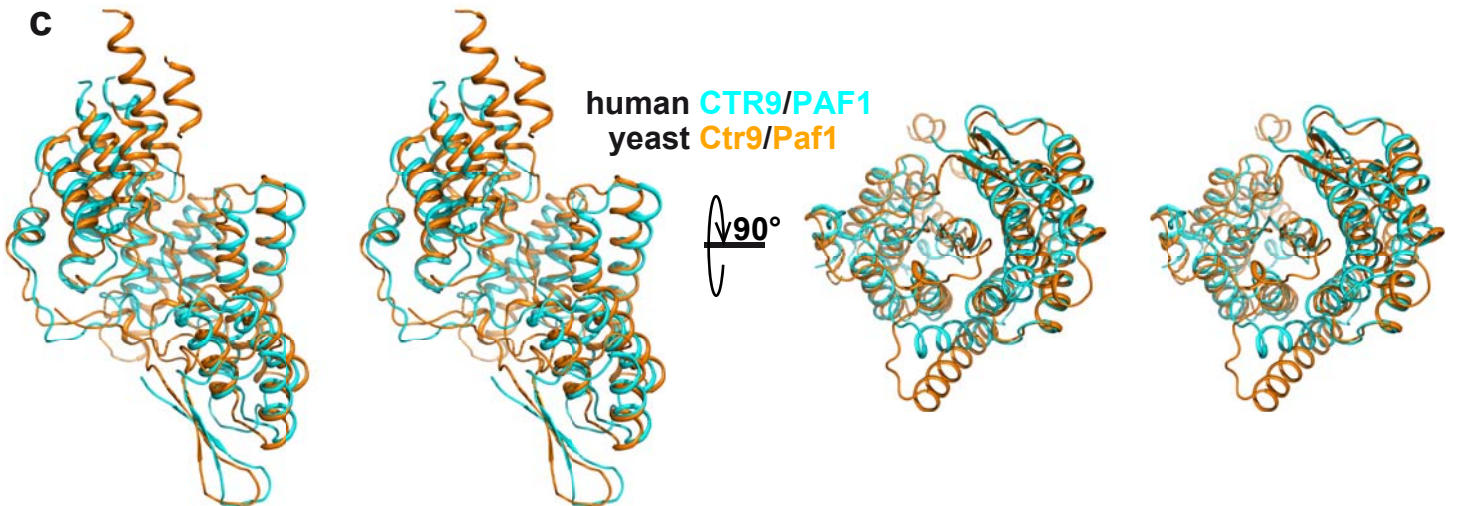



**Supplementary Figure 4. Human CTR9/PAF1 and yeast Ctr9/Paf1 subcomplexes contain either canonical or atypical TPR motifs and have a similar heterodimeric structure.** (a) Five TPR motifs of Ctr9 are compared with the canonical TPR fold of the Ppp5 protein. The motifs from human CTR9 and yeast Ctr9 are colored cyan and orange, respectively. (b) Structure-based sequence alignment of all 10 TPRs in human CTR9 and yeast Ctr9. The canonical TPR sequence is shown at the top cylinder (Lotus purple) and the conserved residues of Ctr9 are shaded in red. (c) Superimposition of the structures of the human CTR9/PAF1 (cyan) heterodimer and the yeast Ctr9/Paf1 (orange) heterodimer.

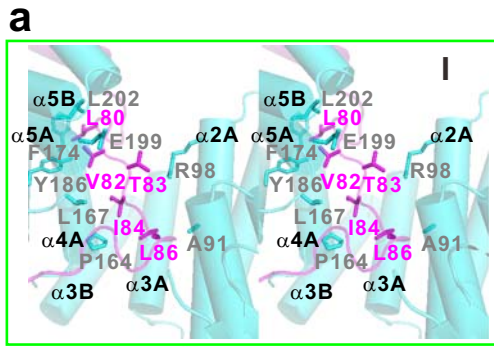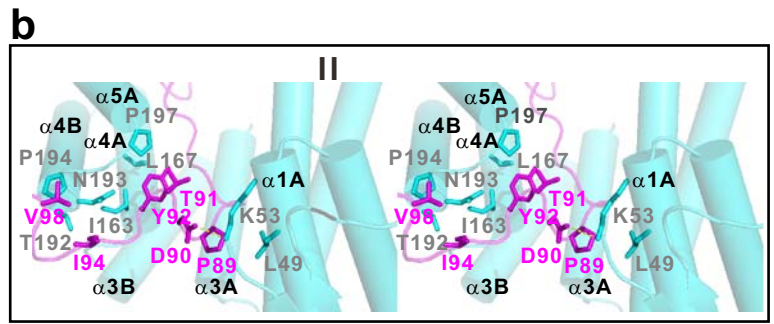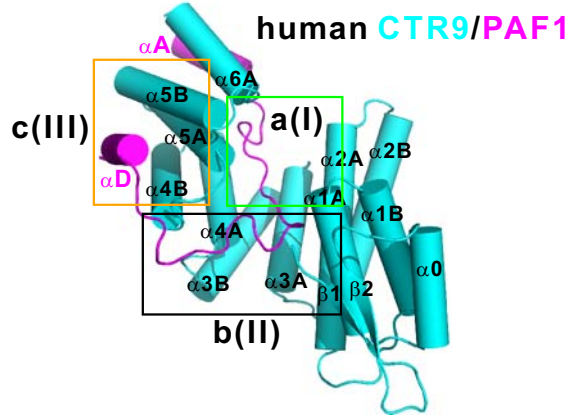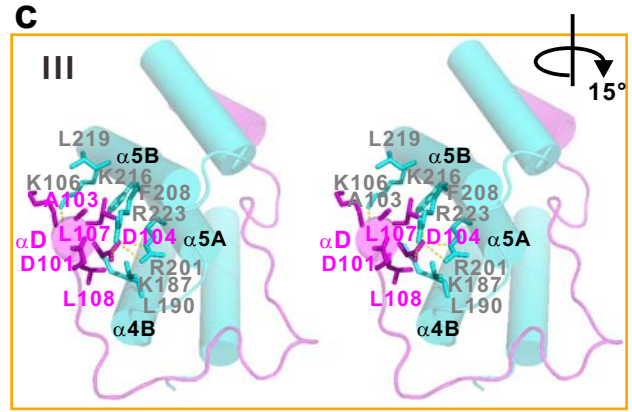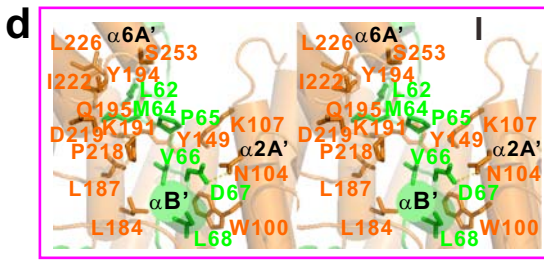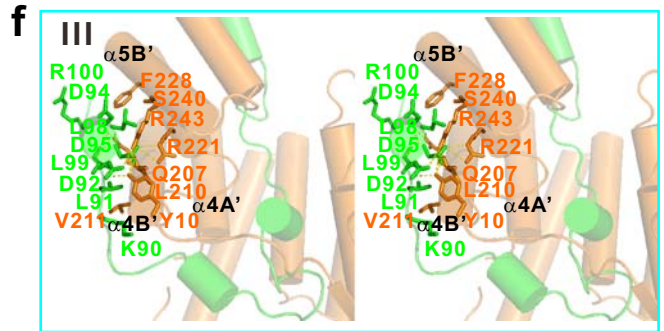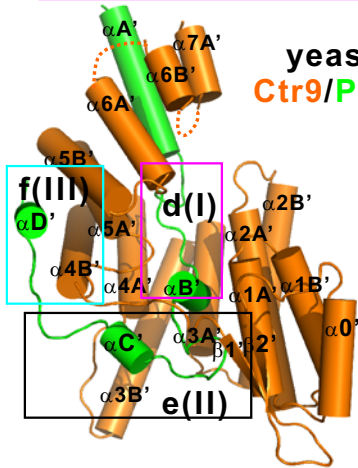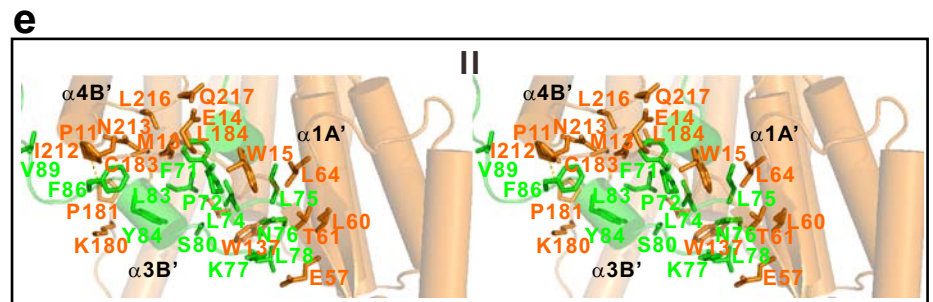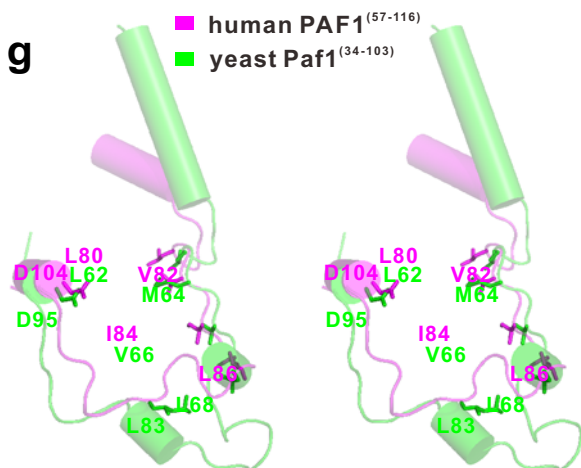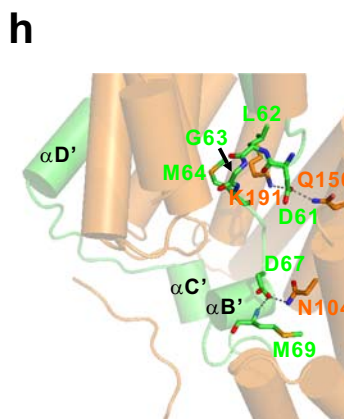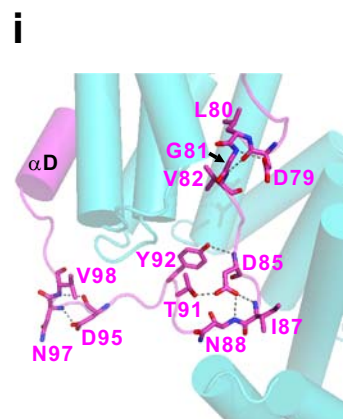

**Supplementary Figure 5. The interaction interface of the human CTR9/PAF1 and yeast Ctr9/Paf1 heterodimers.** (a-b) The CTR9<sup>(1-249)</sup>/PAF1<sup>(57-116)</sup> interface is divided into three regions corresponding to the CTR9 TPR1-5 concave channel/N-terminal loop of PAF1 (a), the side of the TPR1-5/C-terminal loop of PAF1 (b), and the convex surface of the TPR4-5/ $\alpha$ D helix of PAF1 (c). (d-f) The Ctr9<sup>(1-313)</sup>/Paf1<sup>(34-103)</sup> interface is divided into three regions corresponding to the Ctr9 TPR1-5 concave channel/N-terminal loop of Paf1 (d), the side of the TPR1-5/C-terminal loop of Paf1 (e), and the convex surface of the TPR4-5/ $\alpha$ D' helix of Paf1 (f). The interaction details between CTR9 and PAF1 (a-c) or between Ctr9 and Paf1 (d-f) in the three regions are shown in stereo view. The side chain of the residues involved in the interactions are drawn in the stick model. Charge-charge and hydrogen bonding interactions are highlighted by dashed yellow lines. (g) A stereo view of the superimposition of the hook-fold structures of PAF1<sup>(57-116)</sup> and Paf1<sup>(34-103)</sup>. PAF1 and Paf1 are colored magenta and green, respectively. (h and i) The highly conserved residues are important for yeast Ctr9/Paf1 (h) and human CTR9/PAF1 (i) complexes formation. For clarify, only residues involved in hydrogen bonding are shown in (h) and (i), and the side chain are drawn in the stick model. Hydrogen bonding interactions are highlighted by dashed grey lines.

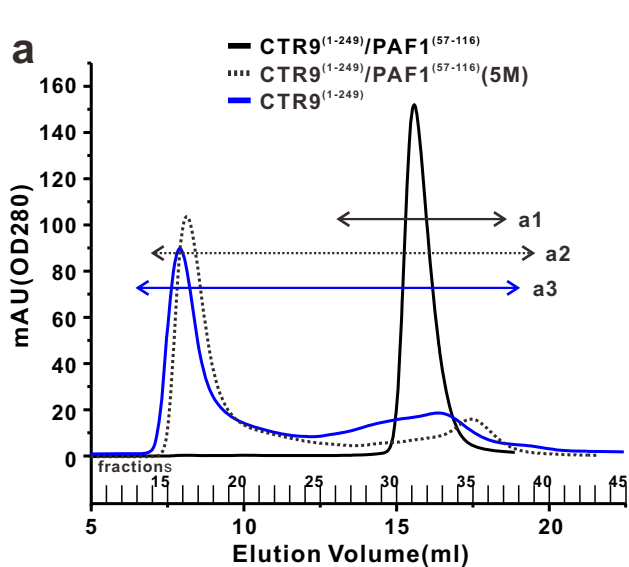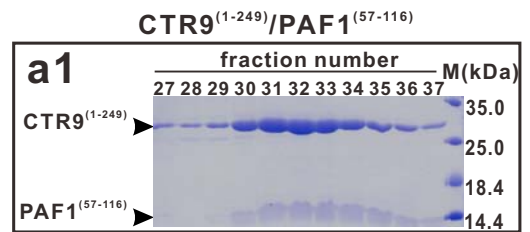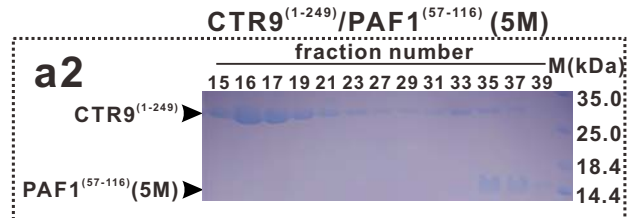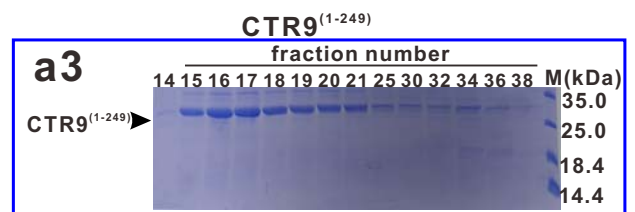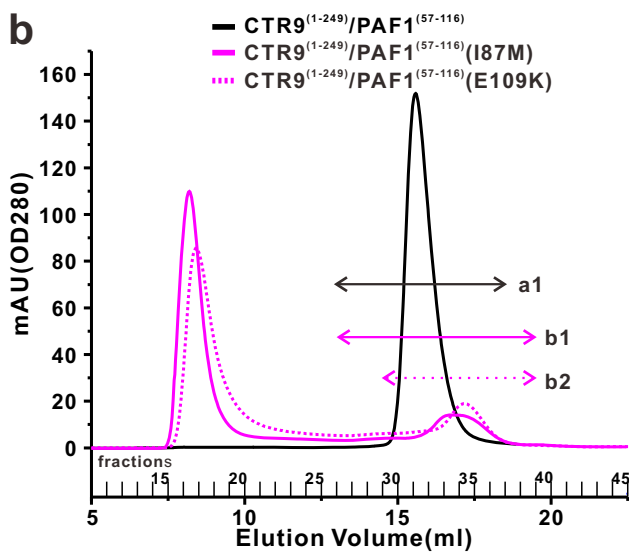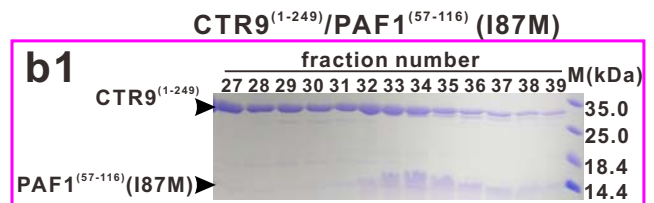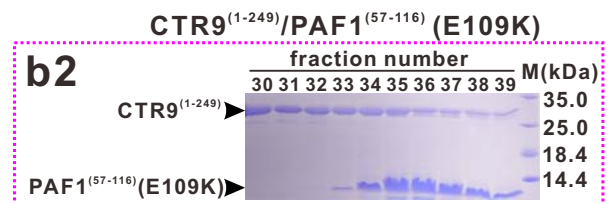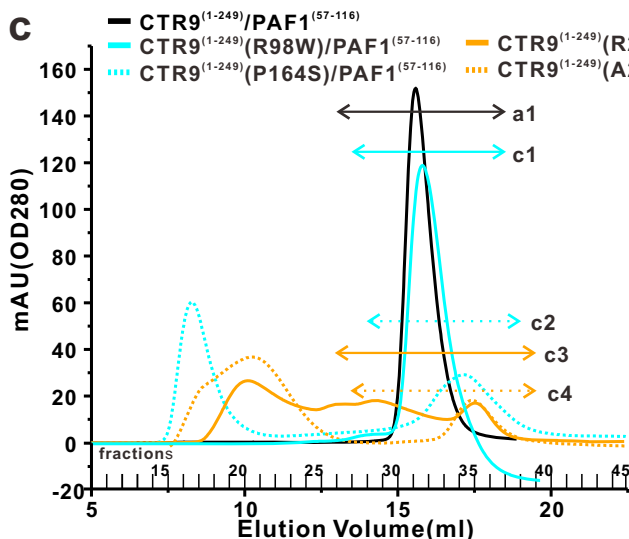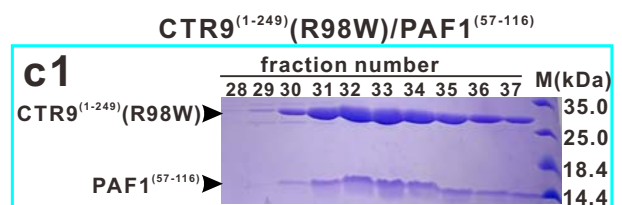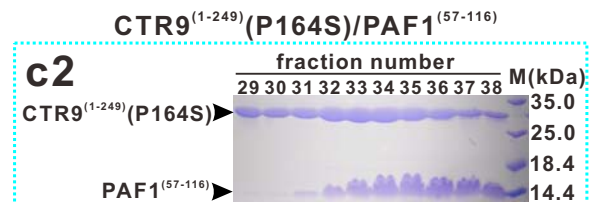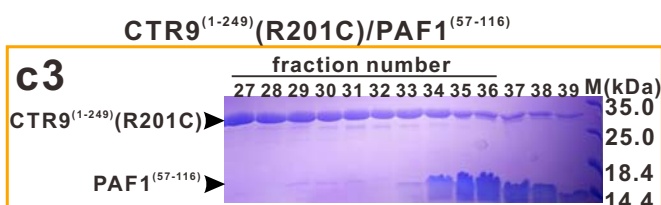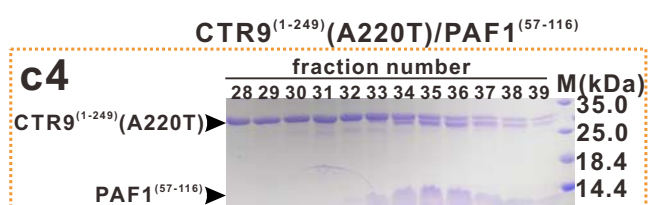

**Supplementary Figure 6. Disease-associated amino acid substitutions abolish the interactions between CTR9<sup>(1-249)</sup> and PAF1<sup>(57-116)</sup>.** (a-c) Analytical gel filtration profiles and SDS-PAGEs of CTR9<sup>(1-249)</sup>/PAF1<sup>(57-116)</sup> (a and a1), CTR9<sup>(1-249)</sup>/PAF1<sup>(57-116)</sup>(5M) (a and a2), CTR9<sup>(1-249)</sup> (a and a3), CTR9<sup>(1-249)</sup>/PAF1<sup>(57-116)</sup>(I87M) (b and b1), CTR9<sup>(1-249)</sup>/PAF1<sup>(57-116)</sup>(E109K) (b and b2), CTR9<sup>(1-249)</sup>(R98W)/PAF1<sup>(57-116)</sup> (c and c1), CTR9<sup>(1-249)</sup>(P164S)/PAF1<sup>(57-116)</sup> (c and c2), CTR9<sup>(1-249)</sup>(R201C)/PAF1<sup>(57-116)</sup> (c and c3), and CTR9<sup>(1-249)</sup>(A220T)/PAF1<sup>(57-116)</sup> (c and c4). Those fractions shown in correspondent gels are indicated by a two-way arrow. Uncropped gels are shown in Supplementary Fig. 8.

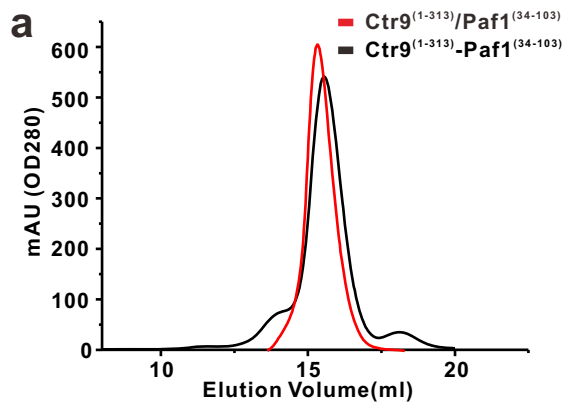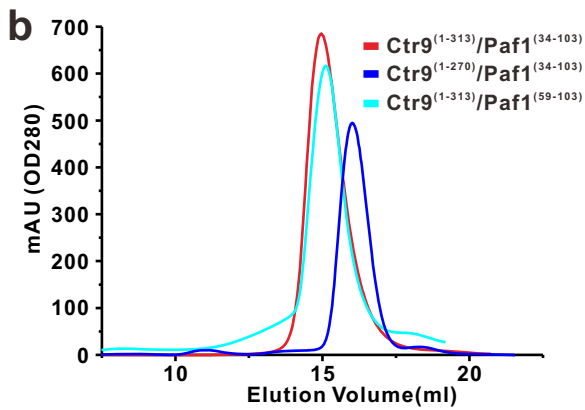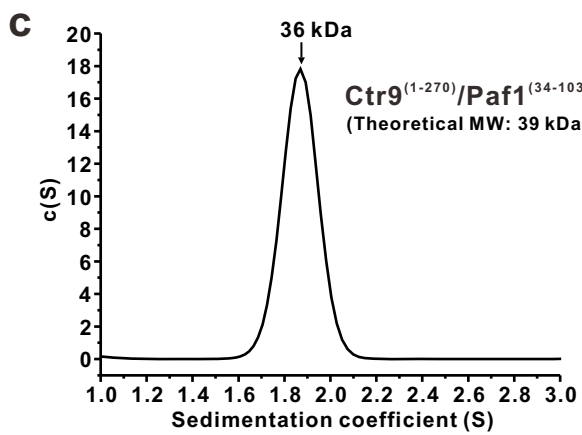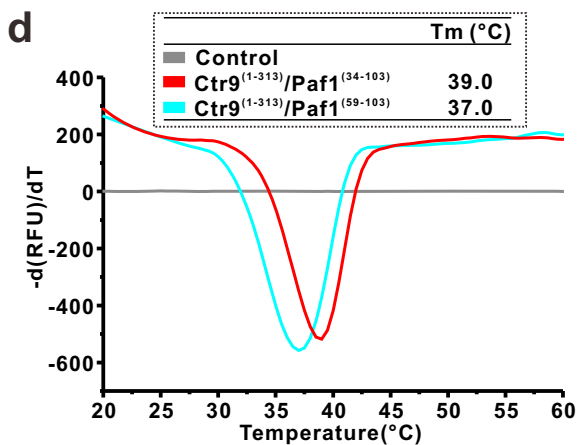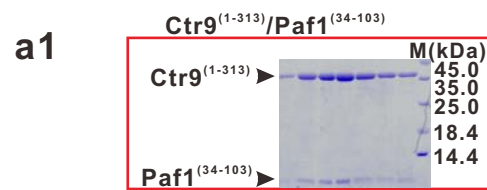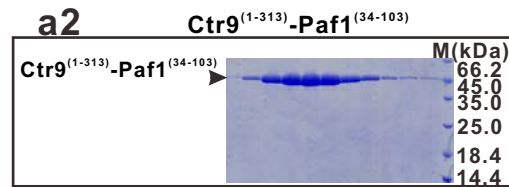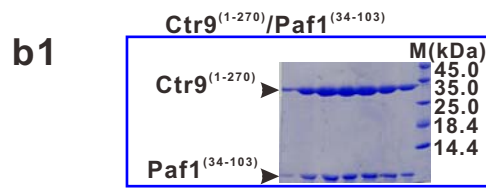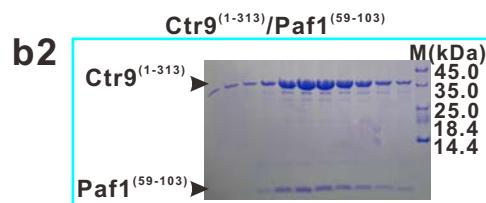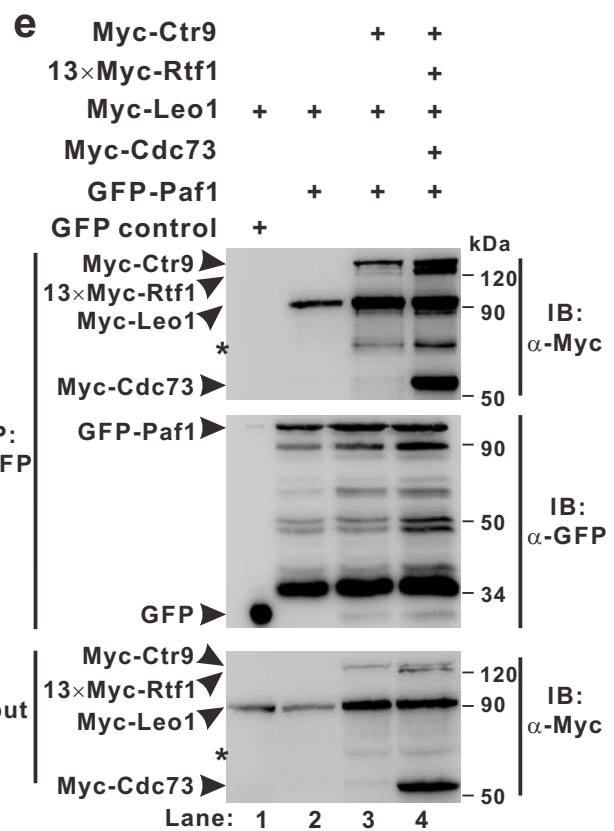

**Supplementary Figure 7. Yeast Ctr9/Paf1 subcomplexes adopt heterodimers with a 1:1 stoichiometry.** (a and b) Analytical gel filtration profiles and SDS-PAGE of two separate chains of Ctr9<sup>(1-313)</sup>/Paf1<sup>(34-103)</sup> complex protein (a and a1) and the single chain fusion of Ctr9<sup>(1-313)</sup>-Paf1<sup>(34-103)</sup> protein (a and a2). "/" denotes protein complex with separate chains, while "-" denotes protein in a single-chain fusion. Analytical gel filtration profiles and SDS-PAGEs of Ctr9<sup>(1-270)</sup>/Paf1<sup>(34-103)</sup> (b and b1) and Ctr9<sup>(1-270)</sup>/Paf1<sup>(59-103)</sup> (b and b2). (c) c(s) distributions from the SV run for the Ctr9<sup>(1-270)</sup>/Paf1<sup>(34-103)</sup> (1 mg/ml). (d) Differential scanning fluorimetry-based thermal denaturation assay showing the temperature-dependent denaturation profiles of Ctr9<sup>(1-313)</sup>/Paf1<sup>(34-103)</sup> (red line) and Ctr9<sup>(1-313)</sup>/Paf1<sup>(59-103)</sup> (cyan line). (e) Co-IP experiments by GFP-tagged yeast Paf1 (GFP-Paf1). Extracts were prepared from HEK293T cells transfected with various combinations of plasmids, as indicated, immunoprecipitated with agarose-conjugated anti-GFP and subsequently immunoblotted with anti-Myc or anti-GFP, as indicated. The top panel shows the IP results. The middle panel represents the IP of GFP and GFP-Paf1. The bottom panel shows 3% input of the Myc fusion proteins used for each IP. The asterisk indicate the degradation of Myc-Ctr9. Uncropped gels and blots are shown in Supplementary Fig. 8.



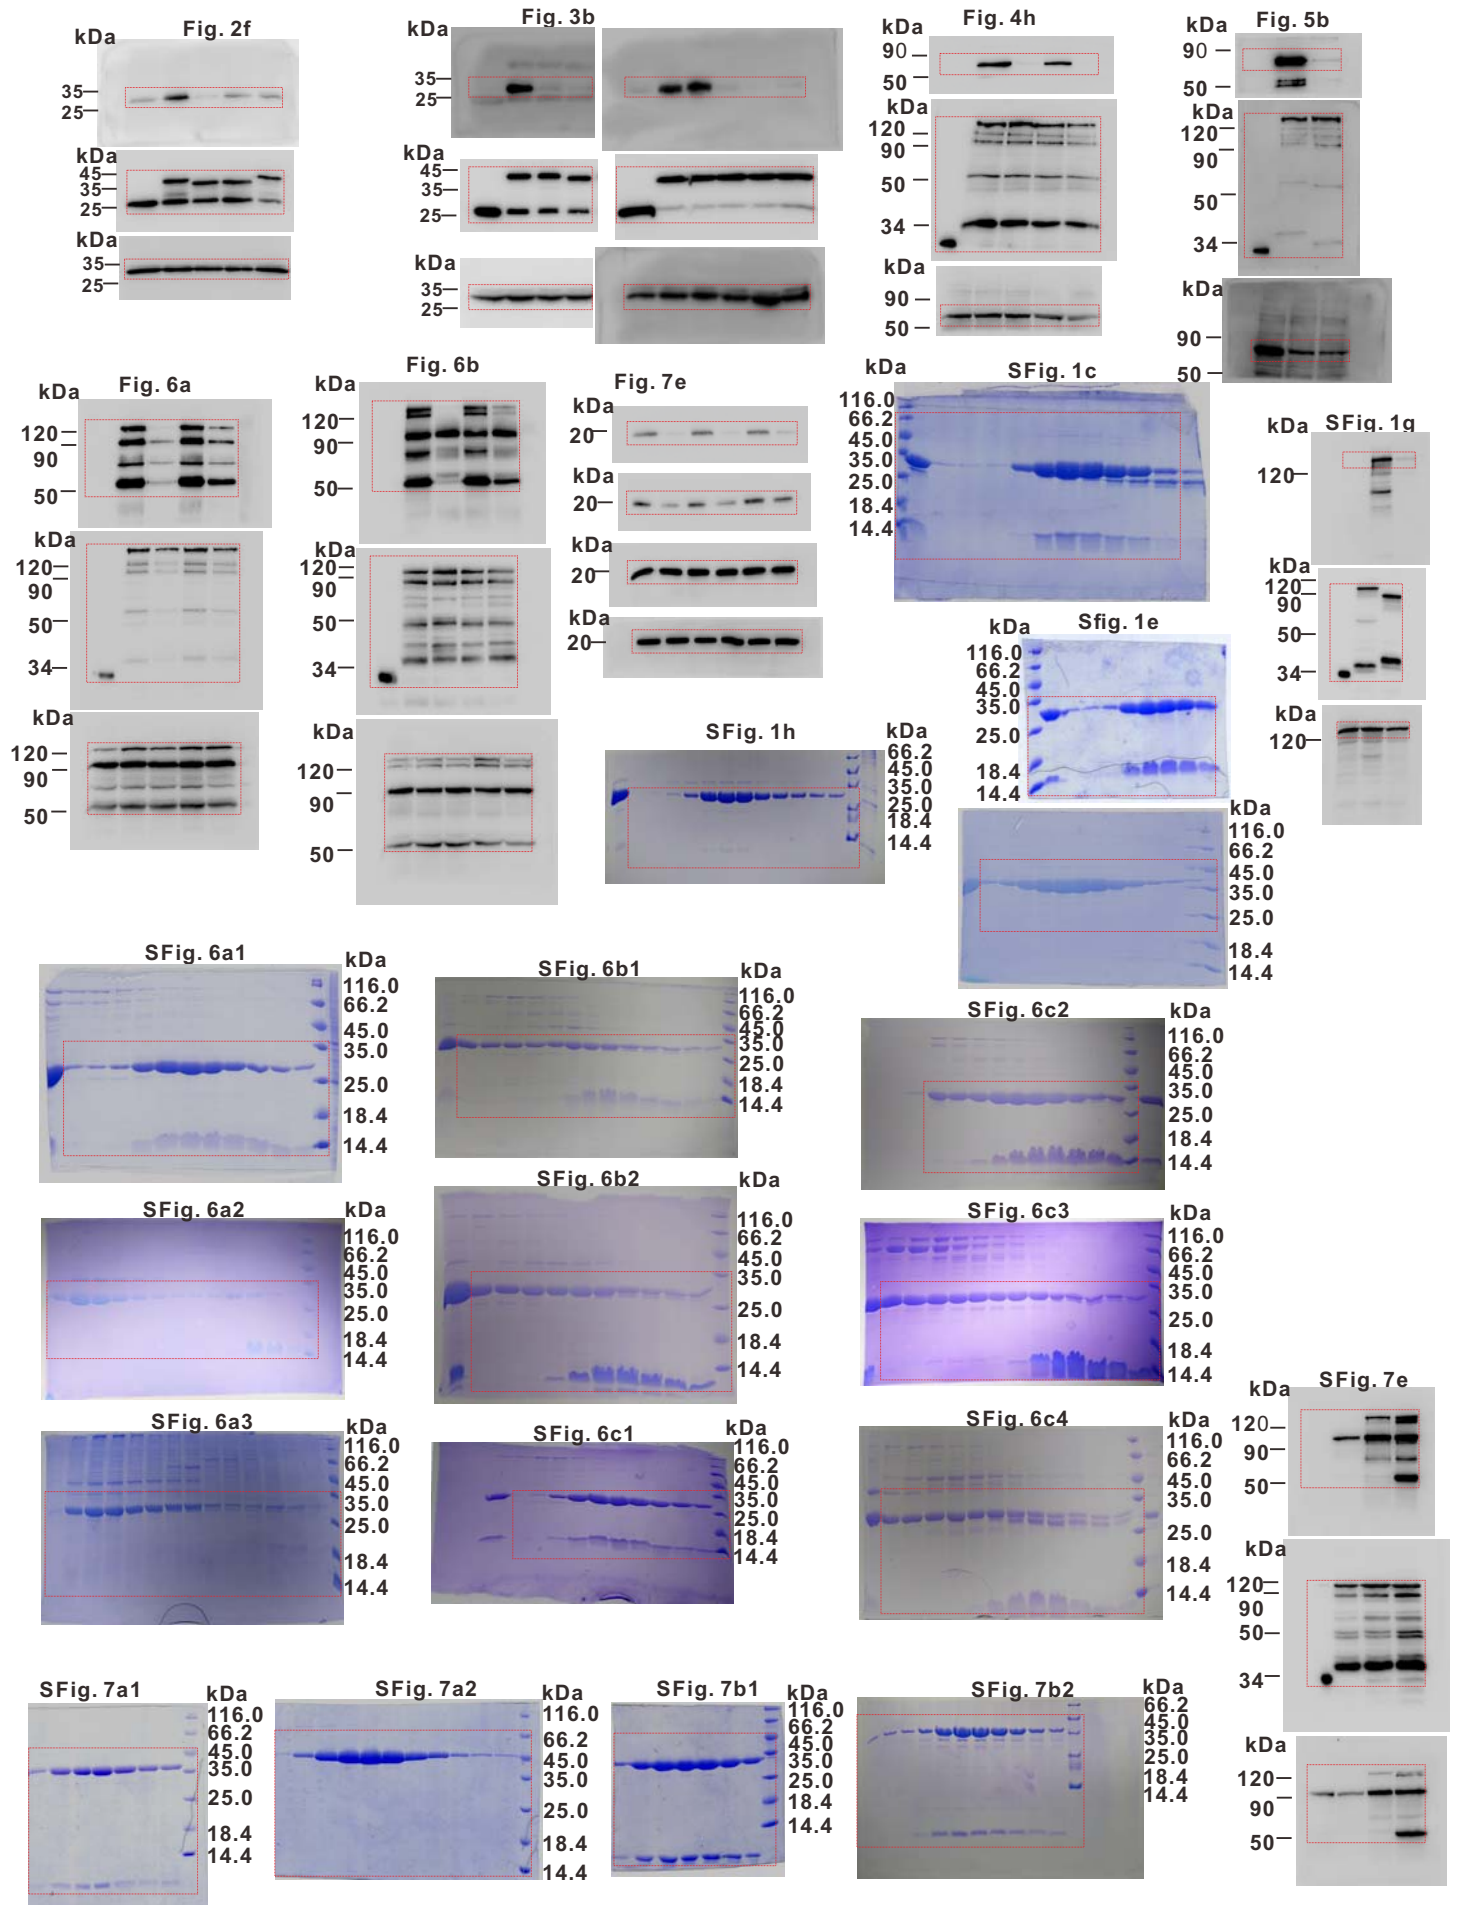

**Supplementary Figure 8.** Full uncropped figures of western blots and SDS-PAGE gels. Cropped regions are indicated with rectangles as appropriate.



**Supplementary Table 1. Data collection and refinement statistics**

|                                                     | <b>Ctr9-Paf1 Se-Met</b>             | <b>CTR9-PAF1 Se-Met</b>             | <b>CTR9-PAF1 Native</b>             |
|-----------------------------------------------------|-------------------------------------|-------------------------------------|-------------------------------------|
| <b>Data collection</b>                              |                                     |                                     |                                     |
| Space group                                         | <i>P</i> 3221                       | <i>P</i> 3112                       | <i>P</i> 3112                       |
| Cell dimensions                                     |                                     |                                     |                                     |
| <i>a</i> , <i>b</i> , <i>c</i> (Å)                  | 95.95, 95.95, 115.50                | 82.55, 82.55, 145.54                | 82.42, 82.42, 145.66                |
| $\alpha$ , $\beta$ , $\gamma$ (°)                   | 90, 90, 120                         | 90, 90, 120                         | 90, 90, 120                         |
| Resolution (Å)                                      | 50.00-2.53 (2.62-2.53) <sup>a</sup> | 50.00-2.83 (2.88-2.83) <sup>a</sup> | 50.00-2.53 (2.57-2.53) <sup>a</sup> |
| <i>R</i> <sub>merge</sub> (%)                       | 4.7 (85.8)                          | 7.3 (67.0)                          | 6.7 (63.2)                          |
| <i>I</i> / $\sigma$ <i>I</i>                        | 29.2 (2.0)                          | 38.8 (4.0)                          | 28.9 (4.0)                          |
| Completeness (%)                                    | 99.8 (99.9)                         | 100.0 (99.6)                        | 100.0 (100.0)                       |
| Redundancy                                          | 5.5 (5.5)                           | 19.7(16.6)                          | 9.9 (10.1)                          |
| <b>Refinement</b>                                   |                                     |                                     |                                     |
| Resolution (Å)                                      | 47.98-2.53                          |                                     | 41.21-2.53                          |
| No. reflections                                     | 35,677                              |                                     | 17,815                              |
| <i>R</i> <sub>work</sub> / <i>R</i> <sub>free</sub> | 19.39/24.30                         |                                     | 20.18/24.02                         |
| No. atoms                                           |                                     |                                     |                                     |
| Protein                                             | 2,739                               |                                     | 2,276                               |
| Ligand/ion                                          | 3                                   |                                     | 0                                   |
| Water                                               | 85                                  |                                     | 103                                 |
| <i>B</i> -factors                                   |                                     |                                     |                                     |
| Protein                                             | 47.6                                |                                     | 55.7                                |
| Ligand/ion                                          | 53.5                                |                                     |                                     |
| Water                                               | 39.7                                |                                     | 44.9                                |
| R.m.s. deviations                                   |                                     |                                     |                                     |
| Bond lengths (Å)                                    | 0.008                               |                                     | 0.009                               |
| Bond angles (°)                                     | 0.984                               |                                     | 1.078                               |

<sup>a</sup> Values in parentheses are for highest-resolution shell.

**Supplementary Table 2. Disease-associated mutations in human CTR9**

| Mutation type        | Mutation (Amino acid)                                                                                                                                                                                                                                                                                                                                                                                                                                                                                                                                                                                                                                                                                                                                                                                                                                                                                                                                                                                                                                                                                                                                                                                                                                                                                                               |
|----------------------|-------------------------------------------------------------------------------------------------------------------------------------------------------------------------------------------------------------------------------------------------------------------------------------------------------------------------------------------------------------------------------------------------------------------------------------------------------------------------------------------------------------------------------------------------------------------------------------------------------------------------------------------------------------------------------------------------------------------------------------------------------------------------------------------------------------------------------------------------------------------------------------------------------------------------------------------------------------------------------------------------------------------------------------------------------------------------------------------------------------------------------------------------------------------------------------------------------------------------------------------------------------------------------------------------------------------------------------|
| Missense             | L10F, E15G, L19I, P25L, Q36R, I43V, A46D, A48V, L63V, A67T, D74H, D77V, L89F, R98W, N102K, D108V, T118A, D121N, Y126C, N129I, H153Y, N157S, S159F, P164S, K169N, S173F, Y185C, K188N, R191H, A198T, R201C, K213T, E215K, A220T, A224S, E226K, C231F, V232M, S250F, S267N, L272W, A276E, V288F, H294Y, M304K, E320G, Y329C, F344C, E376K, G382S, A386T, G399C, H400Y, K402E, D426N, A437T, P450T, L454F, N456D, A459V, G468W, R480S, R480C, A494T, A494S, A494P, A494V, A509V, R525L, E526K, Y534C, R536H, E556A, W568L, G572D, G572V, N573H, W581C, P583H, S596F, G608S, Q613K, R620Q, K624N, R627H, R631H, R631C, K637R, R641K, K645M, N646K, L657V, H659P, R664C, R667C, T677S, A678T, D682V, A688V, A700T, Y704C, Y704D, H714D, V720I, Y722C, A747T, D750N, L764F, D771N, A782V, A789V, Y792N, L796F, V799A, V799L, G800E, D806H, S818F, L820V, R830Q, R830W, R832H, D835Y, E838Q, R839Q, R839W, E846Q, K849N, R853M, L857P, Q860H, R864H, K872N, L874P, R878Q, R878W, E883K, L889I, M890T, F891C, R903G, R910H, R910C, S911C, S911F, E916D, D924Y, D926G, E948D, R961I, G966R, K982Q, R984Q, R985C, P986T, K993R, R999C, P1002L, S1003L, K1007R, S1015L, D1018H, D1022N, L1026H, K1027R, S1059F, N1062S, G1067D, E1069K, G1071S, R1075K, R1099Q, R1080W, P1090S, S1097Y, E1105K, R1122H, S1143Y, N1157I, S1161L, S1165L, D1173N |
| Nonsense             | G27*, Q391*, R394*, E515*, E526*, W553*, Q629*, G654*, G800*, R1077*                                                                                                                                                                                                                                                                                                                                                                                                                                                                                                                                                                                                                                                                                                                                                                                                                                                                                                                                                                                                                                                                                                                                                                                                                                                                |
| Frameshift deletion  | T57fs*5, K107fs*96, L475fs*63, V673fs*13, R903fs*102, D923fs*1                                                                                                                                                                                                                                                                                                                                                                                                                                                                                                                                                                                                                                                                                                                                                                                                                                                                                                                                                                                                                                                                                                                                                                                                                                                                      |
| Frameshift insertion | L24fs*6, L368Ffs*6                                                                                                                                                                                                                                                                                                                                                                                                                                                                                                                                                                                                                                                                                                                                                                                                                                                                                                                                                                                                                                                                                                                                                                                                                                                                                                                  |
| In-frame deletion    | R962delR                                                                                                                                                                                                                                                                                                                                                                                                                                                                                                                                                                                                                                                                                                                                                                                                                                                                                                                                                                                                                                                                                                                                                                                                                                                                                                                            |

Various disease-associated mutations in CTR9 were listed, based on the data extracted from the COSMIC database (<http://cancer.sanger.ac.uk/cosmic>). A total of 38 missense mutations were located in 38 residues of CTR9<sup>(1-249)</sup>. These 38 mutations were divided into three categories. The three categories were named as interface, folding, and others, and amino acid substitutions in each category were colored in red, orange, and green, respectively. Only mutations used in this study were shown in Fig. 3a.

**Supplementary Table 3. Disease-associated mutations in human PAF1**

| Mutation type        | Mutation (Amino acid)                                                                                                                                                                                                                                                                                                                                                                                                                                                                                                                  |
|----------------------|----------------------------------------------------------------------------------------------------------------------------------------------------------------------------------------------------------------------------------------------------------------------------------------------------------------------------------------------------------------------------------------------------------------------------------------------------------------------------------------------------------------------------------------|
| Missense             | R11W, R11L, S38I, D54N, H70Q, K71R, H72N, H72R, H72Q, D73H, D73V, L74I, L74R, T76S, D85N, L86F, I87M, D95N, D95Y, E105D, E109K, A125T, K133N, T134I, E149K, E167K, I176L, P201L, E203D, M250V, D251N, G254R, F261S, E266K, T267M, R271Q, R273Q, E277K, D285N, W297L, N301H, G306D, G318C, R331C, R335H, R336Q, S343L, A347T, R354W, M356T, E358K, K359T, R367W, R367Q, P376L, E412Q, R420W, R420Q, K431R, K431N, E438K, E441K, R445Q, E469K, D470N, R471S, Q475L, D481A, G489A, R492W, S495N, A519V, D522N, A526D, D527N, D527H, D531N |
| Nonsense             | E25*, G28*, W130*, R132*, R198*, E469*, G472*                                                                                                                                                                                                                                                                                                                                                                                                                                                                                          |
| Frameshift deletion  | T76fs*24, S174fs*48, K230fs*11, Q475fs*>57, G485fs*>47                                                                                                                                                                                                                                                                                                                                                                                                                                                                                 |
| Frameshift insertion | G401fs*>134, G408fs*>125                                                                                                                                                                                                                                                                                                                                                                                                                                                                                                               |
| In-frame deletion    | F313delF, E399delE, K406delK, A519_A526delAASDSS...                                                                                                                                                                                                                                                                                                                                                                                                                                                                                    |

Various disease-associated mutations in PAF1 were listed, based on the data extracted from the COSMIC database (<http://cancer.sanger.ac.uk/cosmic>). A total of 17 missense mutations were located in 12 residues of PAF<sup>(57-116)</sup>. These 17 mutations were divided into three categories. The three categories were named as interface, folding, and others, and amino acid substitutions in each category were colored in red, orange, and green, respectively. Only mutations used in this study were shown in Fig. 3a.

**Supplementary Table 4. Yeast strains used in this study.**

| Strain name | Genotype                                                                    | Reference    |
|-------------|-----------------------------------------------------------------------------|--------------|
| SEY6210     | <i>MATalpha his3D200 leu2-3,112 lys2-801 trp1-D901 ura3-52 suc2-D9 GAL+</i> | <sup>1</sup> |
| YXY01       | SEY6210 <i>URA3 LEU2</i>                                                    | This study   |
| YXY02       | SEY6210 <i>paf1::URA3</i>                                                   | This study   |
| YXY03       | SEY6210 <i>paf1::URA3 pP1k-PAF1::LEU2</i>                                   | This study   |
| YXY04       | SEY6210 <i>paf1::URA3 pP1k-PAF1(4S)::LEU2</i>                               | This study   |
| YXY05       | SEY6210 <i>paf1::URA3 pP1k-PAF1(L83S)::LEU2</i>                             | This study   |
| YXY06       | SEY6210 <i>paf1::URA3 pP1k-PAF1(D95K)::LEU2</i>                             | This study   |
| P           | promoter                                                                    |              |

Supplementary Reference:

1. Robinson JS, Klionsky DJ, Banta LM, Emr SD. Protein sorting in *Saccharomyces cerevisiae*: isolation of mutants defective in the delivery and processing of multiple vacuolar hydrolases. *Mol. Cell. Biol.* **8**, 4936-4948 (1988).
